# Supplementary material for: Predictors of response to CDK4/6i retrial after prior CDK4/6i failure in ER+ metastatic breast cancer
Source: PubMed Central journal article supplement — NPJ Breast Cancer. 2024 Oct 18;10:92. doi: 10.1038/s41523-024-00699-3 (PMC11489574; doi:10.1038/s41523-024-00699-3), 2024-10-18
Supplement: 41523_2024_699_MOESM1_ESM.pdf [file 41523_2024_699_MOESM1_ESM.pdf]

| Best Overall Response (PRISSMM Criteria)                              |                        |                     |                        |                     |                        |                     |
|-----------------------------------------------------------------------|------------------------|---------------------|------------------------|---------------------|------------------------|---------------------|
|                                                                       | Cohort 1 (n 34)        |                     | Cohort 2 (n 48)        |                     | Cohort 3 (n 127)       |                     |
|                                                                       | First CDK4/6i exposure | CDK4/6i retreatment | First CDK4/6i exposure | CDK4/6i retreatment | First CDK4/6i exposure | CDK4/6i retreatment |
| Disease Progression                                                   | 0                      | 5 (15%)             | 14 (29.1%)             | 23 (47.9%)          | 39 (30.7%)             | 52 (40.9%)          |
| Stable Disease                                                        | 10 (29%)               | 10 (29%)            | 6 (12.5%)              | 12 (25%)            | 30 (23.6%)             | 31 (24.4%)          |
| Radiological Benefit                                                  | 11 (32%)               | 10 (29%)            | 25 (52.0%)             | 7 (14.5%)           | 54 (42.5%)             | 28 (22.0%)          |
| Non-evaluable<br>(Treatment changed before<br>first re-staging image) | 13 (38%)               | 9 (26%)             | 3 (6.2%)               | 6 (12.5%)           | 4 (3.1%)               | 16 (12.6%)          |

### Supplementary Table 1: Best Overall Response by Cohort

Best overall response by radiographic PRISSMM criteria is outlined by cohort in the table above. Patients that were nonevaluable were mainly patients that did not get radiographic imaging to determine disease state prior to changing therapies.
